# Supplementary material for: Network Analysis of Genome-Wide Selective Constraint Reveals a Gene Network Active in Early Fetal Brain Intolerant of Mutation
Source: PubMed Central journal article supplement (PMC4909280; doi:10.1371/journal.pgen.1006121), 2016-06-15
Supplement: pgen.1006121.s001.pdf [file pgen.1006121.s001.pdf]

| Measures               | P values | Observed |
|------------------------|----------|----------|
| Node #                 | 0.001    | 72       |
| Edge #                 | 0.001    | 146      |
| Clustering coefficient | 0.008    | 0.355    |
| Constraint score       | 0.001    | 509.6    |
