# Supplementary material for: Network Analysis of Genome-Wide Selective Constraint Reveals a Gene Network Active in Early Fetal Brain Intolerant of Mutation
Source: PubMed Central journal article supplement (PMC4909280; doi:10.1371/journal.pgen.1006121), 2016-06-15
Supplement: pgen.1006121.s002.pdf [file pgen.1006121.s002.pdf]

| Sig.<br>Tissues | Fetal brain        |                    | CD3                |                    | CD8                |                    | CD34               |                    | Fetal thymus       |                    | Fetal heart        |                    |
|-----------------|--------------------|--------------------|--------------------|--------------------|--------------------|--------------------|--------------------|--------------------|--------------------|--------------------|--------------------|--------------------|
|                 | Null<br>model<br>1 | Null<br>model<br>2 | Null<br>model<br>1 | Null<br>model<br>2 | Null<br>model<br>1 | Null<br>model<br>2 | Null<br>model<br>1 | Null<br>model<br>2 | Null<br>model<br>1 | Null<br>model<br>2 | Null<br>model<br>1 | Null<br>model<br>2 |
| Thres.          |                    |                    |                    |                    |                    |                    |                    |                    |                    |                    |                    |                    |
| 0.5             | 0                  | 0                  | 0                  | 0.01               | 0.123              | 0.099              | 0.149              | 0.196              | 0.181              | 0.395              | 0.318              | 0.344              |
| 0.4             | 0                  | 0                  | 0.001              | 0.022              | 0                  | 0.01               | 0.035              | 0.14               | 0.322              | 0.526              | 0.003              | 0.034              |
| 0.3             | 0                  | 0                  | 0                  | 0.004              | 0                  | 0.008              | 0                  | 0.004              | 0.393              | 0.732              | 0.04               | 0.278              |
| 0.2             | 0                  | 0                  | 0                  | 0.034              | 0                  | 0.008              | 0                  | 0                  | 0.372              | 0.85               | 0                  | 0.016              |
| 0.1             | 0                  | 0.01               | 0.008              | 0.104              | 0                  | 0.016              | 0                  | 0                  | 0                  | 0.047              | 0.001              | 0.148              |
