# Supplementary material for: Network Analysis of Genome-Wide Selective Constraint Reveals a Gene Network Active in Early Fetal Brain Intolerant of Mutation
Source: PubMed Central journal article supplement (PMC4909280; doi:10.1371/journal.pgen.1006121), 2016-06-15
Supplement: pgen.1006121.s003.pdf [file pgen.1006121.s003.pdf]

| Thres | Number of tissue specific genes in the top subnetwork |     |     |      |              |             | Number of tissue specific genes in the entire network |                        |                      |                             | Tissue specificity per gene |               |
|-------|-------------------------------------------------------|-----|-----|------|--------------|-------------|-------------------------------------------------------|------------------------|----------------------|-----------------------------|-----------------------------|---------------|
|       | Fetal brain                                           | CD3 | CD8 | CD34 | Fetal thymus | Fetal heart | Avg. across sig. Tissue                               | Avg. across all Tissue | Median across tissue | Standard dev. across tissue | Mean                        | Standard dev. |
| 0.5   | 9                                                     | 3   | 2   | 1    | 1            | 3           | 3.2                                                   | 1.5                    | 319                  | 114.5                       | 0.9 (3.1)                   | 2.2 (3.1)     |
| 0.4   | 12                                                    | 4   | 4   | 3    | 1            | 4           | 4.7                                                   | 2.1                    | 457                  | 145                         | 1.3 (3.5)                   | 2.7 (3.5)     |
| 0.3   | 14                                                    | 6   | 5   | 8    | 1            | 6           | 6.7                                                   | 3                      | 600                  | 186.2                       | 1.6 (3.9)                   | 3.1 (3.8)     |
| 0.2   | 15                                                    | 7   | 8   | 10   | 2            | 9           | 8.5                                                   | 4.3                    | 760                  | 237.9                       | 2.0 (4.2)                   | 3.5 (4.1)     |
| 0.1   | 16                                                    | 9   | 10  | 10   | 5            | 10          | 10                                                    | 6.7                    | 927                  | 287.8                       | 2.5 (4.6)                   | 4.0 (4.4)     |
