# Supplementary material for: Network Analysis of Genome-Wide Selective Constraint Reveals a Gene Network Active in Early Fetal Brain Intolerant of Mutation
Source: PubMed Central journal article supplement (PMC4909280; doi:10.1371/journal.pgen.1006121), 2016-06-15
Supplement: pgen.1006121.s004.pdf [file pgen.1006121.s004.pdf]

| Preferential expression threshold |              | CD8  | CD34    | Fetal thymus | Fetal heart | CD3     |
|-----------------------------------|--------------|------|---------|--------------|-------------|---------|
| 0.1                               | Fetal brain  | 0.39 | 0.39    | 0.07         | na          | na      |
|                                   | CD8          |      | 2.3E-04 | 9.5E-04      | na          | na      |
|                                   | CD34         |      |         | 0.14         | na          | na      |
|                                   | Fetal thymus |      |         |              | na          | na      |
|                                   | Fetal heart  |      |         |              |             | na      |
| 0.2                               | Fetal brain  | 0.21 | 0.34    | na           | 1.8E-03     | 0.15    |
|                                   | CD8          |      | 8.3E-04 | na           | 0.06        | 0       |
|                                   | CD34         |      |         | na           | 0.02        | 3.3E-04 |
|                                   | Fetal thymus |      |         |              | na          | na      |
|                                   | Fetal heart  |      |         |              |             | 0.04    |
| 0.3                               | Fetal brain  | 0.25 | 0.18    | na           | na          | 0.08    |
|                                   | CD8          |      | 4.0E-06 | na           | na          | 0       |
|                                   | CD34         |      |         | na           | na          | 2.3E-05 |
|                                   | Fetal thymus |      |         |              | na          | na      |
|                                   | Fetal heart  |      |         |              |             | na      |
| 0.4                               | Fetal brain  | 0.13 | na      | na           | 4.8E-04     | 0.13    |
|                                   | CD8          |      | na      | na           | 0.21        | 0       |
|                                   | CD34         |      |         | na           | na          | na      |
|                                   | Fetal thymus |      |         |              | na          | na      |
|                                   | Fetal heart  |      |         |              |             | 0.21    |
| 0.5                               | Fetal brain  | na   | na      | na           | na          | 0.04    |
|                                   | CD8          |      | na      | na           | na          | na      |
|                                   | CD34         |      |         | na           | na          | na      |
|                                   | Fetal thymus |      |         |              | na          | na      |
|                                   | Fetal heart  |      |         |              |             | na      |
