# Supplementary material for: Network Analysis of Genome-Wide Selective Constraint Reveals a Gene Network Active in Early Fetal Brain Intolerant of Mutation
Source: PubMed Central journal article supplement (PMC4909280; doi:10.1371/journal.pgen.1006121), 2016-06-15
Supplement: pgen.1006121.s005.pdf [file pgen.1006121.s005.pdf]

| Gene set              | Total counts | In OMIM | Not in OMIM | P-values |
|-----------------------|--------------|---------|-------------|----------|
| Roadmap epigenome     | 9701 (9729)  | 1989    | 7712        | NA       |
| Top subnetwork        | 71 (72)      | 26      | 45          | 0.0013   |
| Fetal brain (TS)      | 15 (16)      | 6       | 9           | 0.068    |
| CD34 (TS)             | 10           | 5       | 5           | 0.036    |
| CD8 (TS)              | 10           | 4       | 6           | 0.13     |
| Fetal thymus (TS)     | 5            | 2       | 3           | 0.273    |
| All significant genes | 124 (126)    | 40      | 84          | 0.00155  |
