# Supplementary material for: Network Analysis of Genome-Wide Selective Constraint Reveals a Gene Network Active in Early Fetal Brain Intolerant of Mutation
Source: PubMed Central journal article supplement (PMC4909280; doi:10.1371/journal.pgen.1006121), 2016-06-15
Supplement: pgen.1006121.s006.pdf [file pgen.1006121.s006.pdf]

| Gene set                                                        | Roadmap | Top subnetwork | P-values |
|-----------------------------------------------------------------|---------|----------------|----------|
| Total #                                                         | 9729    | 72             | NA       |
| Disease classified genes                                        | 1455    | 19             | 0.0081   |
| Nervous System Diseases                                         | 554     | 14             | 0.0017   |
| Eye Diseases                                                    | 162     | 2              | 0.64     |
| Male Urogenital Diseases                                        | 122     | 1              | 0.81     |
| Female Urogenital Diseases and Pregnancy Complications          | 131     | 2              | 0.52     |
| Cardiovascular Diseases                                         | 149     | 3              | 0.3      |
| Hemic and Lymphatic Diseases                                    | 153     | 1              | 0.88     |
| Congenital, Hereditary, and Neonatal Diseases and Abnormalities | 969     | 15             | 0.18     |
| Skin and Connective Tissue Diseases                             | 195     | 2              | 0.75     |
| Nutritional and Metabolic Diseases                              | 414     | 2              | 0.98     |
| Endocrine System Diseases                                       | 144     | 2              | 0.57     |
| Pathological Conditions, Signs and Symptoms                     | 269     | 6              | 0.12     |
