# Supplementary material for: Network Analysis of Genome-Wide Selective Constraint Reveals a Gene Network Active in Early Fetal Brain Intolerant of Mutation
Source: PubMed Central journal article supplement (PMC4909280; doi:10.1371/journal.pgen.1006121), 2016-06-15
Supplement: pgen.1006121.s007.pdf [file pgen.1006121.s007.pdf]

| Name                                                      | All | Mapped | Subnetwork | KS              | OV                   |
|-----------------------------------------------------------|-----|--------|------------|-----------------|----------------------|
| REACTOME DEVELOPMENTAL BIOLOGY                            | 397 | 344    | 10         | 2.53E-19        | 1.83E-05             |
| REACTOME IMMUNE SYSTEM                                    | 934 | 702    | 9          | 4.98E-08        | 0.019561<br>975      |
| REACTOME ADAPTIVE IMMUNE SYSTEM                           | 540 | 421    | 8          | 3.13E-10        | 0.002079<br>468      |
| REACTOME AXON GUIDANCE                                    | 252 | 220    | 8          | 4.62E-16        | 1.65E-05             |
| REACTOME MRNA PROCESSING                                  | 162 | 120    | 8          | 9.06E-12        | 1.05E-07             |
| KEGG CALCIUM SIGNALING PATHWAY                            | 179 | 163    | 7          | 6.00E-08        | 1.36E-05             |
| KEGG SPLICEOSOME                                          | 129 | 85     | 7          | 5.32E-21        | 9.60E-08             |
| REACTOME MRNA SPLICING                                    | 112 | 74     | 7          | 6.26E-20        | 3.19E-08             |
| REACTOME PROCESSING OF CAPPED INTRON CONTAINING PRE MRNA  | 141 | 102    | 7          | 3.21E-13        | 3.99E-07<br>0.004205 |
| KEGG PATHWAYS IN CANCER                                   | 329 | 301    | 6          | 4.05E-12        | 154                  |
| KEGG REGULATION OF ACTIN CYTOSKELETON                     | 217 | 188    | 6          | 8.08E-13        | 0.000273<br>77       |
| REACTOME CELL CYCLE                                       | 422 | 332    | 6          | 0.007953<br>708 | 0.007123<br>284      |
| REACTOME MRNA SPLICING MINOR PATHWAY                      | 46  | 20     | 6          | 2.90E-05        | 3.56E-11<br>0.000301 |
| REACTOME SIGNALLING BY NGF                                | 218 | 191    | 6          | 3.04E-21        | 509<br>0.001695      |
| KEGG FOCAL ADHESION                                       | 202 | 188    | 5          | 9.72E-07        | 729                  |
| KEGG LONG TERM POTENTIATION                               | 71  | 60     | 5          | 9.64E-15        | 2.97E-06<br>0.004917 |
| KEGG MAPK SIGNALING PATHWAY                               | 268 | 233    | 5          | 3.02E-15        | 745<br>0.000812      |
| REACTOME HIV INFECTION                                    | 208 | 163    | 5          | 1.32E-06        | 42<br>0.010256       |
| REACTOME HIV LIFE CYCLE                                   | 126 | 95     | 5          | 569             | 4.27E-05             |
| REACTOME LATE PHASE OF HIV LIFE CYCLE                     | 105 | 85     | 5          | 0.013577<br>625 | 2.27E-05<br>0.003636 |
| REACTOME NEURONAL SYSTEM                                  | 280 | 219    | 5          | 3.80E-28        | 422                  |
| REACTOME NGF SIGNALLING VIA TRKA FROM THE PLASMA MEMBRANE | 138 | 120    | 5          | 1.09E-14        | 0.000157<br>186      |
| REACTOME SIGNALING BY GPCR                                | 921 | 415    | 5          | 1.63E-11        | 0.062102<br>29       |
