# Supplementary material for: Network Analysis of Genome-Wide Selective Constraint Reveals a Gene Network Active in Early Fetal Brain Intolerant of Mutation
Source: PubMed Central journal article supplement (PMC4909280; doi:10.1371/journal.pgen.1006121), 2016-06-15
Supplement: pgen.1006121.s008.pdf [file pgen.1006121.s008.pdf]

| Ensemble        | HUGO     | Sig. | Roadmap |     |     |      |        | BrainSpan - HIP |        |        | BrainSpan - VF |        |        |        | BrainSpan - PCW |        |        |
|-----------------|----------|------|---------|-----|-----|------|--------|-----------------|--------|--------|----------------|--------|--------|--------|-----------------|--------|--------|
|                 |          |      | fbrain  | CD3 | CD8 | CD34 | fHeart | HIP_2A          | HIP_2B | HIP_3A | CGE_2A         | LGE_2A | MGE_2A | STR_3A | PCx_2A          | S1C_3A | IPC_3A |
| ENSG00000174231 | PRPF8    | 1    | 0       | 0   | 0   | 0    | 0      | 1               | 0      | 1      | 1              | 1      | 1      | 1      | 1               | 1      | 1      |
| ENSG00000197102 | DYNC1H1  | 1    | 1       | 0   | 0   | 0    | 0      | 0               | 0      | 0      | 0              | 0      | 0      | 0      | 0               | 0      | 0      |
| ENSG00000086758 | HUWE1    | 1    | 0       | 0   | 0   | 0    | 0      | 0               | 0      | 0      | 0              | 0      | 0      | 0      | 0               | 0      | 0      |
| ENSG00000127616 | SMARCA4  | 1    | 1       | 0   | 0   | 0    | 0      | 1               | 1      | 1      | 1              | 1      | 1      | 1      | 1               | 1      | 1      |
| ENSG00000181222 | POLR2A   | 1    | 0       | 0   | 0   | 0    | 0      | 0               | 0      | 0      | 0              | 0      | 0      | 0      | 0               | 0      | 0      |
| ENSG00000198626 | RYR2     | 1    | 1       | 0   | 0   | 0    | 1      | 0               | 0      | 0      | 0              | 0      | 0      | 0      | 0               | 0      | 0      |
| ENSG00000184634 | MED12    | 1    | 0       | 0   | 0   | 1    | 0      | 1               | 1      | 1      | 1              | 1      | 1      | 1      | 1               | 1      | 1      |
| ENSG00000144028 | SNRNP200 | 1    | 0       | 0   | 0   | 0    | 0      | 1               | 1      | 1      | 1              | 1      | 1      | 1      | 1               | 1      | 1      |
| ENSG00000116424 | CHD4     | 1    | 0       | 0   | 0   | 0    | 0      | 1               | 1      | 1      | 1              | 1      | 1      | 0      | 1               | 0      | 0      |
| ENSG00000198793 | MTOR     | 1    | 0       | 0   | 0   | 0    | 0      | 0               | 0      | 0      | 0              | 0      | 0      | 0      | 0               | 0      | 0      |
| ENSG00000176884 | GRIN1    | 1    | 0       | 0   | 0   | 0    | 0      | 0               | 0      | 0      | 0              | 0      | 0      | 0      | 0               | 0      | 0      |
| ENSG00000177380 | PPF1A3   | 1    | 0       | 0   | 0   | 0    | 0      | 0               | 0      | 0      | 0              | 0      | 0      | 0      | 0               | 0      | 0      |
| ENSG00000118058 | MLL      | 1    | 1       | 0   | 0   | 0    | 0      | 0               | 0      | 0      | 0              | 0      | 0      | 0      | 0               | 0      | 0      |
| ENSG00000104517 | UBR5     | 1    | 0       | 0   | 0   | 0    | 0      | 0               | 0      | 0      | 0              | 0      | 0      | 0      | 0               | 0      | 0      |
| ENSG00000150995 | ITPR1    | 1    | 0       | 0   | 0   | 1    | 0      | 0               | 0      | 0      | 0              | 0      | 0      | 0      | 0               | 0      | 0      |
| ENSG00000141367 | CLTC     | 1    | 0       | 0   | 0   | 0    | 0      | 0               | 0      | 0      | 0              | 0      | 0      | 0      | 0               | 0      | 0      |
| ENSG00000196924 | FLNA     | 1    | 0       | 0   | 1   | 0    | 0      | 0               | 0      | 0      | 0              | 0      | 0      | 0      | 0               | 0      | 0      |
| ENSG00000005007 | UPF1     | 1    | 0       | 0   | 0   | 0    | 0      | 0               | 0      | 0      | 0              | 0      | 0      | 0      | 0               | 0      | 0      |
| ENSG00000172534 | HCFC1    | 1    | 0       | 0   | 0   | 0    | 0      | 0               | 0      | 0      | 0              | 0      | 0      | 0      | 0               | 0      | 0      |
| ENSG00000132153 | DHX30    | 1    | 0       | 0   | 0   | 0    | 0      | 0               | 0      | 0      | 0              | 0      | 0      | 0      | 0               | 0      | 0      |
| ENSG00000115306 | SPTBN1   | 1    | 1       | 1   | 0   | 0    | 1      | 0               | 0      | 0      | 0              | 0      | 0      | 0      | 0               | 0      | 0      |
| ENSG00000115524 | SF3B1    | 1    | 0       | 0   | 0   | 0    | 0      | 0               | 0      | 0      | 0              | 0      | 0      | 0      | 0               | 0      | 0      |
| ENSG00000080503 | SMARCA2  | 1    | 0       | 1   | 1   | 1    | 0      | 0               | 0      | 0      | 0              | 0      | 0      | 0      | 0               | 1      | 1      |
| ENSG00000100346 | CACNA1I  | 1    | 0       | 0   | 0   | 0    | 0      | 0               | 0      | 0      | 0              | 0      | 0      | 0      | 0               | 0      | 0      |
| ENSG00000072501 | SMC1A    | 1    | 0       | 0   | 0   | 0    | 0      | 1               | 1      | 1      | 1              | 1      | 1      | 1      | 1               | 1      | 1      |
| ENSG00000150086 | GRIN2B   | 1    | 1       | 0   | 0   | 0    | 0      | 0               | 1      | 1      | 0              | 1      | 1      | 1      | 0               | 1      | 1      |
| ENSG00000105464 | GRIN2D   | 1    | 0       | 0   | 0   | 0    | 0      | 0               | 0      | 0      | 0              | 0      | 0      | 0      | 0               | 0      | 0      |
| ENSG00000147133 | TAF1     | 1    | 0       | 0   | 0   | 0    | 0      | 0               | 0      | 0      | 0              | 0      | 0      | 0      | 0               | 0      | 0      |
| ENSG00000165280 | VCP      | 1    | 0       | 0   | 0   | 0    | 0      | 0               | 0      | 0      | 0              | 0      | 0      | 0      | 0               | 0      | 0      |
| ENSG00000125107 | CNOT1    | 1    | 0       | 0   | 0   | 0    | 0      | 1               | 1      | 1      | 1              | 1      | 1      | 1      | 1               | 1      | 1      |
| ENSG00000038382 | TRIO     | 1    | 1       | 0   | 0   | 0    | 1      | 0               | 0      | 0      | 0              | 0      | 0      | 1      | 0               | 1      | 1      |
| ENSG00000055163 | CYFIP2   | 1    | 1       | 1   | 1   | 1    | 1      | 0               | 0      | 0      | 0              | 0      | 0      | 0      | 0               | 0      | 0      |
| ENSG00000196235 | SUPT5H   | 1    | 0       | 0   | 0   | 0    | 0      | 0               | 0      | 0      | 0              | 0      | 0      | 0      | 0               | 0      | 0      |
| ENSG00000177283 | FZD8     | 1    | 0       | 0   | 0   | 0    | 0      | 0               | 1      | 1      | 1              | 1      | 1      | 0      | 1               | 0      | 0      |
| ENSG00000105576 | TNPO2    | 1    | 1       | 0   | 0   | 0    | 0      | 0               | 0      | 0      | 0              | 0      | 0      | 0      | 0               | 0      | 0      |
| ENSG00000077809 | GTF2I    | 1    | 1       | 0   | 0   | 0    | 0      | 0               | 0      | 0      | 0              | 0      | 0      | 0      | 0               | 0      | 0      |
| ENSG00000127481 | UBR4     | 1    | 0       | 0   | 0   | 0    | 1      | 0               | 0      | 0      | 0              | 0      | 0      | 0      | 0               | 0      | 0      |
| ENSG00000170004 | CHD3     | 1    | 1       | 1   | 1   | 0    | 0      | 0               | 0      | 0      | 0              | 0      | 1      | 1      | 1               | 1      | 1      |
| ENSG00000187555 | USP7     | 1    | 0       | 0   | 1   | 0    | 0      | 0               | 0      | 0      | 0              | 0      | 0      | 0      | 0               | 0      | 0      |
| ENSG00000101161 | PRPF6    | 1    | 0       | 0   | 0   | 1    | 0      | 0               | 0      | 0      | 0              | 0      | 0      | 1      | 0               | 1      | 1      |
| ENSG00000087460 | GNAS     | 1    | 0       | 0   | 0   | 0    | 0      | 0               | 0      | 0      | 0              | 0      | 0      | 0      | 0               | 0      | 0      |
| ENSG00000125676 | THOC2    | 1    | 0       | 0   | 0   | 0    | 0      | 0               | 1      | 1      | 1              | 1      | 1      | 1      | 1               | 0      | 0      |
| ENSG00000073910 | FRY      | 1    | 1       | 0   | 0   | 1    | 1      | 0               | 0      | 0      | 0              | 0      | 0      | 1      | 0               | 1      | 1      |
| ENSG00000147162 | OGT      | 1    | 0       | 0   | 0   | 0    | 0      | 0               | 0      | 0      | 0              | 0      | 0      | 0      | 0               | 0      | 0      |
| ENSG00000047315 | POLR2B   | 1    | 0       | 0   | 0   | 0    | 0      | 1               | 1      | 1      | 1              | 1      | 0      | 1      | 1               | 1      | 1      |
| ENSG00000156113 | KCNMA1   | 1    | 1       | 0   | 0   | 0    | 0      | 0               | 0      | 0      | 0              | 0      | 0      | 0      | 0               | 0      | 0      |
| ENSG00000160551 | TAOK1    | 1    | 0       | 0   | 0   | 0    | 0      | 0               | 0      | 0      | 0              | 0      | 0      | 0      | 0               | 0      | 0      |
| ENSG00000165288 | BRWD3    | 1    | 0       | 0   | 0   | 0    | 0      | 1               | 1      | 1      | 1              | 1      | 1      | 1      | 1               | 1      | 1      |
| ENSG00000197694 | SPTAN1   | 1    | 1       | 0   | 0   | 0    | 1      | 0               | 0      | 0      | 0              | 0      | 0      | 0      | 0               | 1      | 1      |
| ENSG00000146247 | PHIP     | 1    | 0       | 0   | 0   | 0    | 0      | 1               | 1      | 1      | 1              | 1      | 1      | 0      | 1               | 0      | 0      |
| ENSG00000167986 | DDB1     | 1    | 0       | 0   | 0   | 0    | 0      | 1               | 0      | 0      | 1              | 0      | 0      | 0      | 0               | 0      | 0      |
| ENSG00000126803 | HSPA2    | 1    | 0       | 0   | 0   | 0    | 0      | 0               | 0      | 0      | 0              | 0      | 0      | 0      | 0               | 0      | 0      |
| ENSG00000072195 | SPEG     | 1    | 0       | 0   | 0   | 0    | 0      | 0               | 0      | 0      | 0              | 0      | 0      | 0      | 0               | 0      | 0      |
| ENSG00000108055 | SMC3     | 1    | 0       | 0   | 0   | 0    | 0      | 1               | 1      | 1      | 1              | 1      | 1      | 1      | 1               | 1      | 1      |
| ENSG00000133026 | MYH10    | 1    | 1       | 0   | 0   | 0    | 1      | 1               | 0      | 0      | 1              | 1      | 1      | 1      | 0               | 1      | 0      |
| ENSG00000082898 | XPO1     | 1    | 0       | 0   | 0   | 0    | 0      | 0               | 1      | 1      | 1              | 1      | 1      | 1      | 0               | 0      | 0      |
| ENSG00000036257 | CUL3     | 1    | 0       | 0   | 0   | 0    | 0      | 0               | 0      | 1      | 1              | 0      | 0      | 0      | 0               | 0      | 0      |
| ENSG00000185950 | IRS2     | 1    | 0       | 0   | 0   | 0    | 0      | 0               | 0      | 0      | 0              | 0      | 0      | 0      | 0               | 0      | 0      |
| ENSG00000164742 | ADCY1    | 1    | 1       | 0   | 0   | 0    | 0      | 0               | 0      | 0      | 0              | 0      | 0      | 0      | 0               | 1      | 1      |
| ENSG00000115266 | APC2     | 1    | 0       | 0   | 0   | 0    | 0      | 0               | 0      | 0      | 0              | 0      | 0      | 0      | 0               | 0      | 0      |
| ENSG00000116809 | ZBTB17   | 1    | 0       | 0   | 0   | 0    | 0      | 0               | 0      | 0      | 0              | 0      | 0      | 0      | 0               | 1      | 0      |
| ENSG00000137076 | TLN1     | 1    | 0       | 0   | 1   | 1    | 0      | 0               | 0      | 0      | 0              | 0      | 0      | 0      | 0               | 0      | 0      |
| ENSG00000100345 | MYH9     | 1    | 0       | 1   | 1   | 0    | 0      | 0               | 0      | 0      | 0              | 0      | 0      | 0      | 0               | 0      | 0      |
| ENSG00000167658 | EEF2     | 1    | 0       | 0   | 0   | 1    | 0      | 1               | 1      | 1      | 1              | 1      | 1      | 1      | 1               | 1      | 1      |
| ENSG00000121892 | PDS5A    | 1    | 0       | 0   | 0   | 0    | 0      | 1               | 1      | 0      | 1              | 0      | 1      | 0      | 0               | 0      | 0      |
| ENSG00000105287 | PRKD2    | 1    | 0       | 1   | 1   | 0    | 0      | 1               | 0      | 1      | 1              | 1      | 1      | 0      | 1               | 0      | 0      |
| ENSG00000141867 | BRD4     | 1    | 0       | 0   | 0   | 0    | 0      | 0               | 0      | 0      | 0              | 0      | 0      | 0      | 0               | 0      | 0      |
| ENSG00000109971 | HSPA8    | 0    | 0       | 0   | 0   | 0    | 0      | 0               | 0      | 0      | 0              | 0      | 0      | 0      | 0               | 0      | 0      |
| ENSG00000168036 | CTNNB1   | 0    | 0       | 0   | 0   | 0    | 1      | 1               | 1      | 1      | 0              | 0      | 0      | 0      | 1               | 0      | 0      |
| ENSG00000150991 | UBC      | 0    | 0       | 0   | 0   | 0    | 0      | 0               | 0      | 0      | 0              | 0      | 0      | 0      | 0               | 0      | 0      |
| ENSG00000171608 | PIK3CD   | 0    | 0       | 1   | 1   | 1    | 0      | 0               | 0      | 0      | 0              | 0      | 0      | 0      | 0               | 1      | 1      |
| ENSG00000145675 | PIK3R1   | 0    | 0       | 1   | 1   | 1    | 1      | 0               | 1      | 1      | 0              | 0      | 0      | 0      | 0               | 0      | 0      |
